# Supplementary material for: Unexpected halogen-induced electron–phonon superconductivity in two-dimensional materials
Source: Royal Society of Chemistry journal article supplement (doi:10.1039/d2tc03169h), 2022-01-01
Supplement: d2tc03169h1.pdf [file d2tc03169h1.pdf]

# Unexpected Halogen-Induced Electron-Phonon Superconductivity in Two-dimensional Materials

L.-B. MENG,\* S. Ni, W. M. ZHOU

## Supplementary Information

### I. Computational details.

The superconducting transition temperature  $T_c$  was estimated by using the modified approximate McMillan equation [1],

$$k_B T_c = \frac{\hbar \omega_{\log}}{1.2} \exp\left(\frac{-1.04(1+\lambda)}{\lambda - \mu^* - 0.62\lambda\mu^*}\right) \quad (1)$$

where  $\lambda$  is the EPC strength and the prefactor  $\omega_{\log}$  is a properly defined logarithmic average frequency suggested by Allen and Dynes [2], while  $\mu^*$  is a parameter, accounting for the effective Coulomb repulsion.

The total EPC strength  $\lambda$  can be calculated either by the summation of the individual EPC coefficient  $\lambda_{\mathbf{qv}}$  in the full Brillouin zone (BZ) for all phonon modes or by the integral of the Eliashberg spectral function  $\alpha^2 F(\omega)$ [3], as

$$\lambda = \sum_{\mathbf{qv}} \lambda_{\mathbf{qv}} = 2 \int_0^\infty \frac{\alpha^2 F(\omega)}{\omega} d\omega . \quad (2)$$

The individual EPC coefficient  $\lambda_{\mathbf{qv}}$  for the  $v$ th phonon mode at the wave-vector  $\mathbf{q}$  is defined as

$$\lambda_{\mathbf{qv}} = \frac{1}{N(E_F)M\omega_{\mathbf{qv}}^2} \int_{\text{BZ}} \frac{d\mathbf{k}}{\Omega_{\text{BZ}}} \sum_{ij} \delta(E_{i,\mathbf{k}} - E_F) \times \delta(E_{j,\mathbf{k}+\mathbf{q}} - E_F) |\langle \psi_{i,\mathbf{k}} | \epsilon_{\mathbf{qv}} \cdot \nabla V | \psi_{j,\mathbf{k}+\mathbf{q}} \rangle|^2 \quad (3)$$

and the Eliashberg spectral function  $\alpha^2 F(\omega)$  is given by

$$\alpha^2 F(\omega) = \frac{1}{2} \sum_v \int_{\text{BZ}} \frac{d\mathbf{q}}{\Omega_{\text{BZ}}} \lambda_{\mathbf{qv}} \omega_{\mathbf{qv}} \delta(\omega - \omega_{\mathbf{qv}}) \quad (4)$$

The logarithmically averaged characteristic phonon frequency  $\omega_{\log}$  is defined as

$$\omega_{\log} = \exp\left[\frac{2}{\lambda} \int_0^\infty \alpha^2 F(\omega) \frac{\ln \omega}{\omega} d\omega\right] . \quad (5)$$

The first-principle atomic crystal structure calculations were performed based on density functional theory (DFT) within the projector augmented wave (PAW) [4] pseudopotential method and Perdew-Burke-Ernzerhof (PBE) functional [5] as implemented in the Vienna ab initio simulation package (VASP) [6]. A plane-wave cutoff energy of 600 eV and  $17 \times 17 \times 1$  Monkhorst-Pack  $k$ -point were employed; To eliminate interactions between adjacent layers, a large vacuum distance of 20 Å along

the perpendicular direction was used; All structures were fully relaxed until the residual forces on each atom were less than  $10^{-4}$  eV/Å.

The electronic structures, lattice dynamics and EPC calculations were performed by employing the local density approximation and norm-conserving pseudo-potentials as implemented in the Quantum-ESPRESSO (QE) package [7]. The kinetic energy cutoff and the charge density cutoff of the plane wave basis are chosen to be 110 and 440 Ry, respectively. Self-consistent electron density is evaluated by employing a  $36 \times 36 \times 1$   $\mathbf{k}$ -mesh; Both phonon and EPC are calculated within density functional perturbation theory (DFPT) by using a  $12 \times 12 \times 1$   $\mathbf{q}$ -mesh. The convergence of phonon dispersion and EPC with respect to the energy cutoff and  $\mathbf{q}$ -point sampling has been carefully checked. Phonon frequencies are converged within  $3 \text{ cm}^{-1}$  and  $T_c$  are converged within 1 K (see Table S1). First-principles molecular dynamics (FPMD) simulations in VASP under constant temperature and volume (NVT) were performed with the temperature controlled by a Nose-Hoover thermostat [8] to check the thermal stability. A relatively large supercell of  $6 \times 6 \times 1$  was adopted and each simulation lasted for 8 picosecond (ps) with a time step of 2 femtosecond (fs).

Table S1: Convergence testing for the characteristic vibrational mode  $E_{2g}$  (in  $\text{cm}^{-1}$ ), EPC  $\lambda$ , logarithmically averaged phonon frequency  $\omega_{\log}$  (in Kelvin), and critical transition temperature  $T_c$  (in Kelvin) versus different  $\mathbf{k}$  and  $\mathbf{q}$  meshes.

| System              | $\mathbf{k}, \mathbf{q}$ -mesh settings in QE                                               | $E_{2g}$ | $\lambda$ | $\omega_{\log}$ | $T_c$ |
|---------------------|---------------------------------------------------------------------------------------------|----------|-----------|-----------------|-------|
| ML MgB <sub>2</sub> | $\mathbf{k}=64 \times 64 \times 1, 32 \times 32 \times 1, \mathbf{q}=8 \times 8 \times 1$   | 615.2    | 0.58      | 566.4           | 19.0  |
|                     | $\mathbf{k}=72 \times 72 \times 1, 36 \times 36 \times 1, \mathbf{q}=12 \times 12 \times 1$ | 617.7    | 0.61      | 534.9           | 20.0  |
| F-MgB <sub>2</sub>  | $\mathbf{k}=64 \times 64 \times 1, 32 \times 32 \times 1, \mathbf{q}=8 \times 8 \times 1$   | 595.0    | 1.65      | 332.5           | 46.8  |
|                     | $\mathbf{k}=72 \times 72 \times 1, 36 \times 36 \times 1, \mathbf{q}=12 \times 12 \times 1$ | 597.7    | 1.35      | 389.4           | 46.4  |
| Cl-MgB <sub>2</sub> | $\mathbf{k}=64 \times 64 \times 1, 32 \times 32 \times 1, \mathbf{q}=8 \times 8 \times 1$   | 404.2    | 1.14      | 458.8           | 46.1  |
|                     | $\mathbf{k}=72 \times 72 \times 1, 36 \times 36 \times 1, \mathbf{q}=12 \times 12$          | 405.0    | 1.16      | 448.8           | 46.2  |

To verify the reliability of our computational methods and gain the effective Coulomb repulsion  $\mu^*$  in the  $T_c$  prediction, the crystal structure, electronic, vibrational, and superconducting properties of the parent bulk MgB<sub>2</sub> were calculated as the benchmark. In this calibrating computation, the crystal lattice was relaxed by a  $17 \times 17 \times 15$  Monkhorst-Pack  $\mathbf{k}$ -point and phonon and EPC are calculated with an  $8 \times 8 \times 6$   $\mathbf{q}$ -mesh, and other settings are same as that of 2D systems described above. The obtained results were listed in Table 1 and shown in Fig. S1. The calculated lattices of  $a = 3.077 \text{ Å}$  and  $c = 3.512 \text{ Å}$  are well consistent with the experimental measurements ( $a_{\text{exp}} = 3.086 \text{ Å}$  and  $c_{\text{exp}} = 3.524 \text{ Å}$ ) [9]. The

obtained electronic structure, phonon dispersion and EPC are consistent with the results of previous works [10,11]. When with the retarded Coulomb parameter  $\mu^* = 0.05$ , the calculated EPC  $\lambda$  and  $T_c$  are 0.76 and 40 K, respectively, which both well reproduce the experimental results of  $\lambda_{\text{exp}} \sim 0.75$  and  $T_c \sim 39.2\text{--}40.2$  K [12]. With the structural similarity, we thus reasonably select  $\mu^* = 0.05$  in the estimation of superconductivity for all herein studied systems.

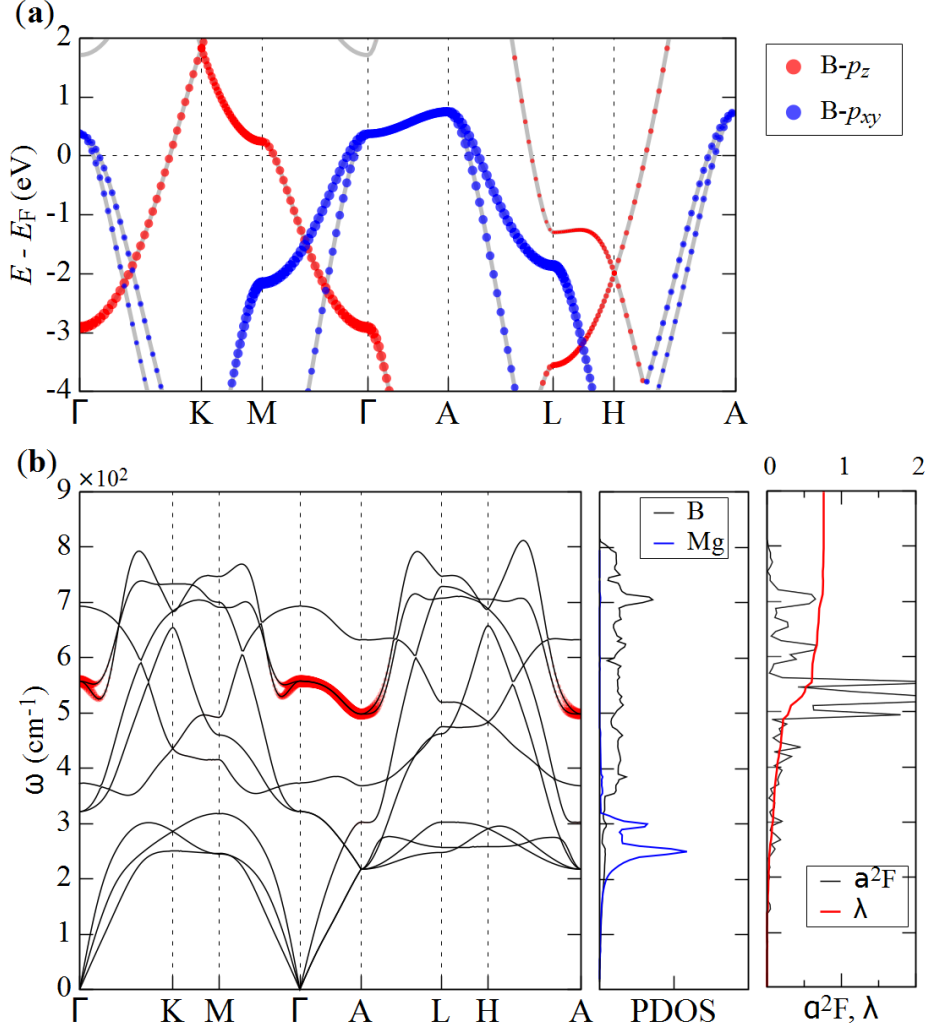

FIG. S1. (a) Electronic band structure decorated with atomic orbital resolved contributions (color encoded dots) for bulk MgB<sub>2</sub>. (b) phonon dispersion curve decorated with individual  $\lambda_{q\nu}$  strength (red dots), atom-resolved phonon density of states (PDOS), and Eliashberg function  $a^2F(\omega)$  and frequency-dependence  $\lambda(\omega)$ .

## II. Supplementary Data and Figures

Table S2: Superconducting transition temperature ( $T_c$ , in Kelvin) estimated with different Coulomb parameter ( $\mu^*$ ).

| System              | $T_c (\mu^*=0.05)$ | $T_c (\mu^*=0.10)$ | $T_c (\mu^*=0.13)$ |
|---------------------|--------------------|--------------------|--------------------|
| F-MgB <sub>2</sub>  | 46.4               | 40.5               | 36.5               |
| Cl-MgB <sub>2</sub> | 46.2               | 38.9               | 34.4               |
| F-TiB <sub>2</sub>  | 17.3               | 14.2               | 11.3               |
| Cl-TiB <sub>2</sub> | 20.0               | 17.3               | 14.4               |

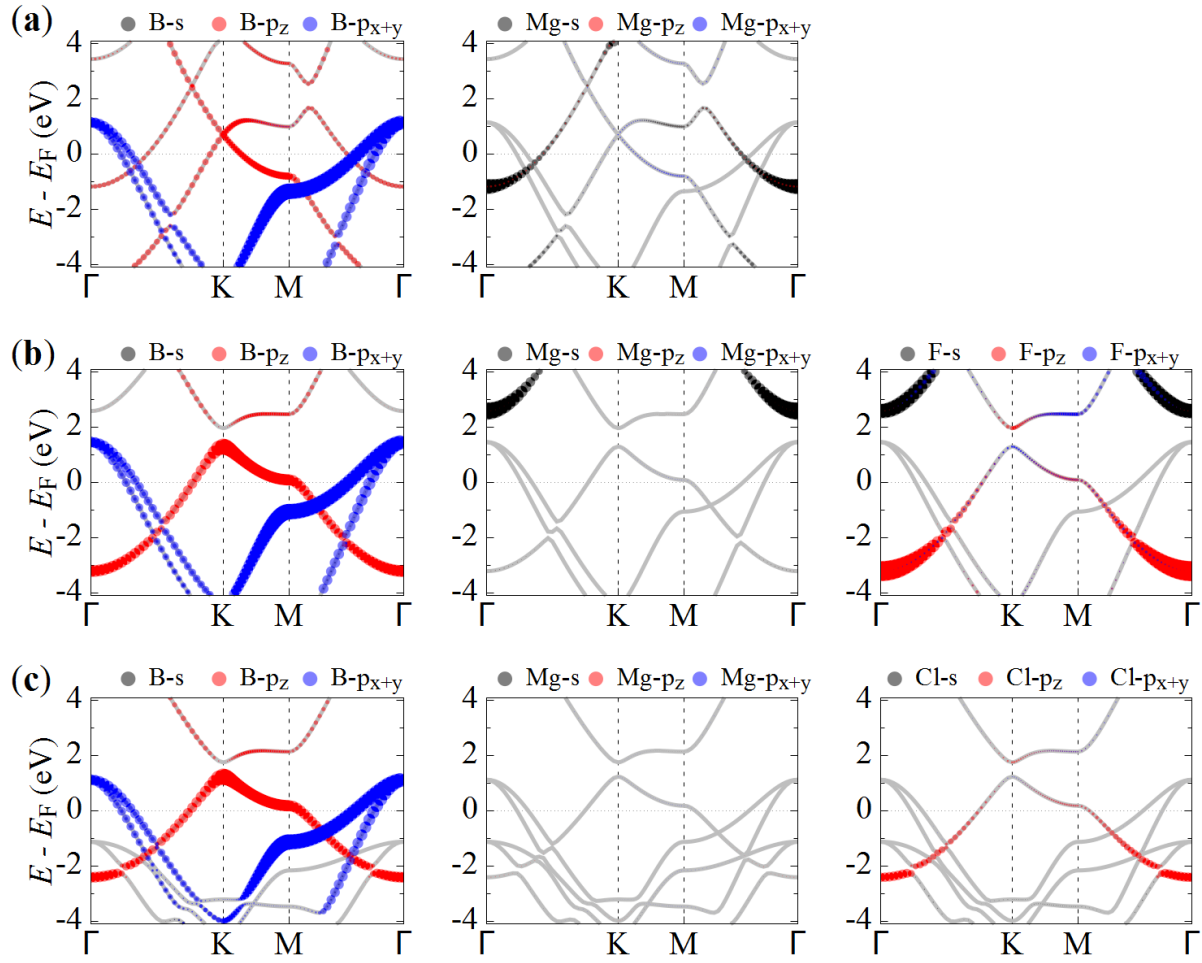

FIG. S2. Electronic band structure decorated with atomic orbital resolved contributions (color encoded dots) for (a) ML  $\text{MgB}_2$ , (b) F- $\text{MgB}_2$  and (c) Cl- $\text{MgB}_2$ . The size of F- $p_z$  dots has been amplified 4-fold for clarity in (b).

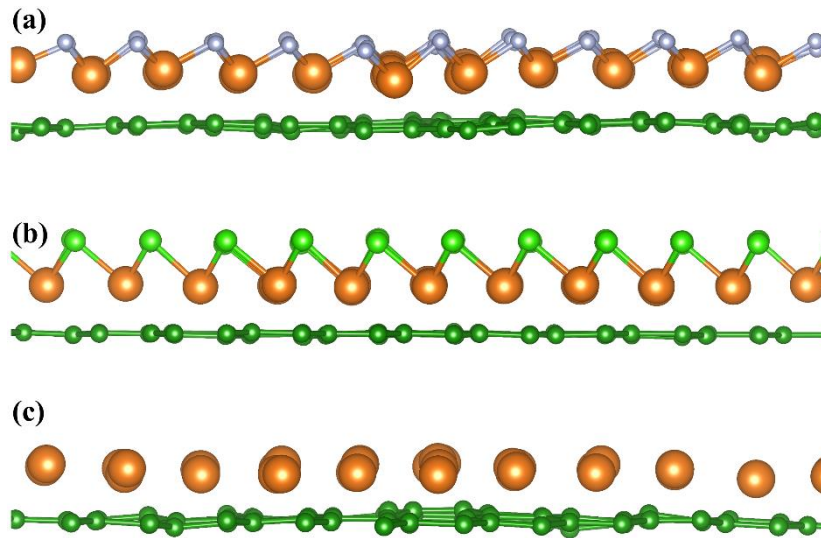

FIG. S3. Side views of final structure snapshots of 8 ps FPMD simulations for (a) F-MgB<sub>2</sub> at 200 K, (b) Cl-MgB<sub>2</sub> at 80 K, and (c) 2D MgB<sub>2</sub> at 350 K. Structures may collapse at respectively higher temperatures.

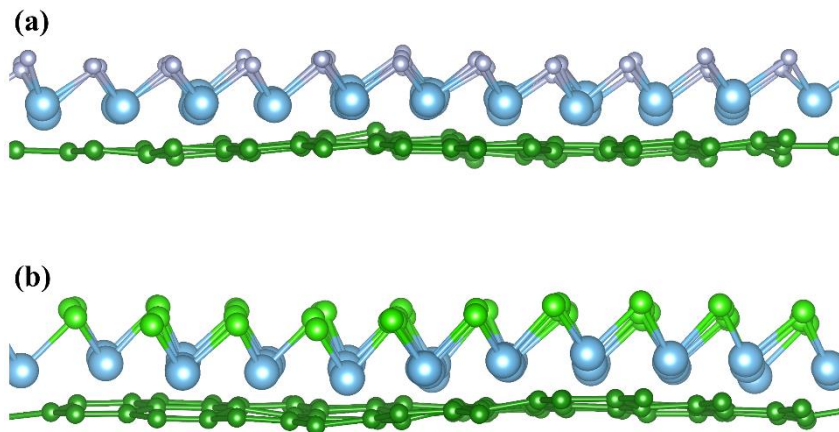

FIG. S4. Side views of final structure snapshots of 8 ps FPMD simulations at 500 K for (a) F-TiB<sub>2</sub> and (b) Cl-TiB<sub>2</sub>.

NOTE: Snapshots of the geometries at the end of 8 ps FPMD simulations indicate that fluorinated/chlorinated TiB<sub>2</sub> can well maintain its structural integrity up to 500 K (only with the expected thermal oscillations of the atoms around their equilibrium positions); the F/Cl-MgB<sub>2</sub> has a lower thermal stability and may collapse at room temperature due to the weakness of Mg-B bond (relative to the Ti-B bond), while the isolated MgB<sub>2</sub> monolayer can be thermally stable at 350 K. These MD results suggest that low temperature are required for the synthesis and store for the fluorinated/chlorinated MgB<sub>2</sub> systems.

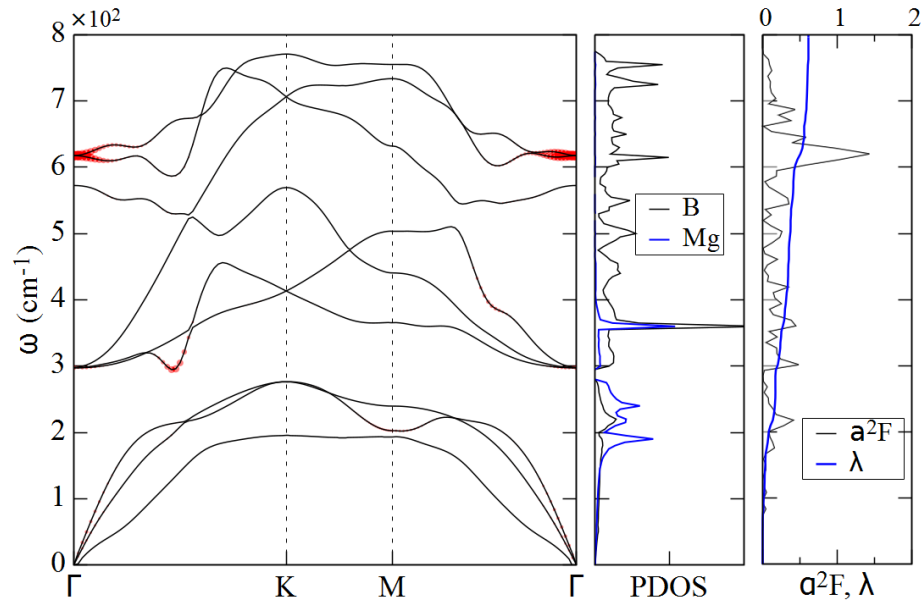

FIG. S5. Phonon dispersion curve decorated with individual  $\lambda_{qv}$  strength (red dots), atom-resolved phonon density of states (PDOS), and Eliashberg function  $\alpha^2F(\omega)$  and frequency-dependence  $\lambda(\omega)$  of ML MgB<sub>2</sub>.

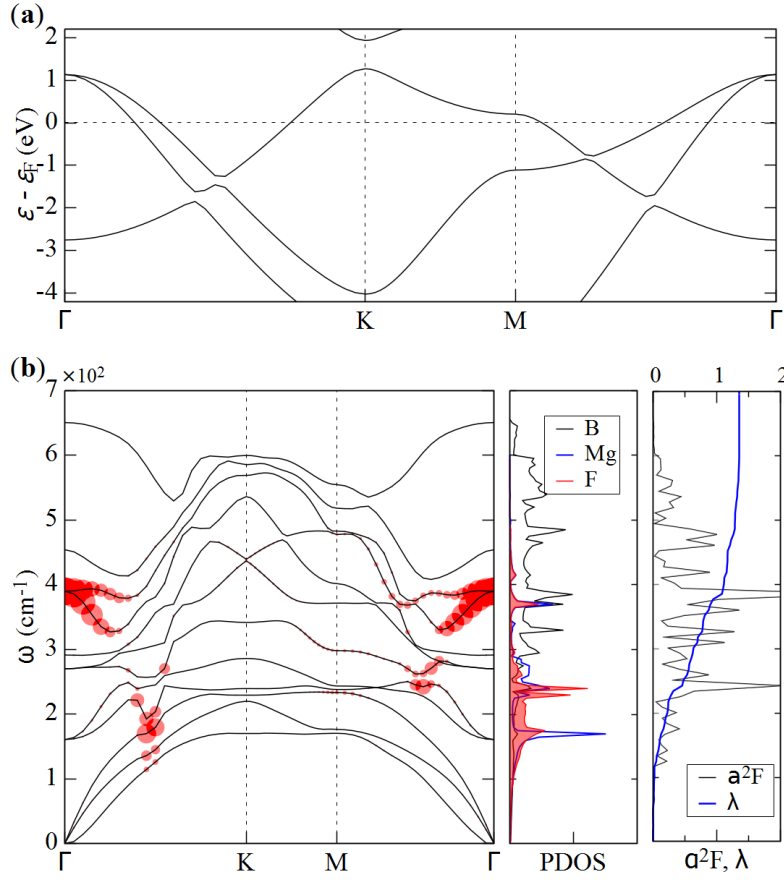

Figure S6. (a) Electronic band structure, and (b) phonon dispersion curve (left panel), atom-resolved phonon density of states (PDOS, mid panel), and Eliashberg function  $\alpha^2F(\omega)$  and  $\lambda(\omega)$  (right panel) of F-MgB<sub>2</sub> under  $\delta = 5\%$  tensile strain. The color dots decorated in phonon dispersion indicate the strength of individual EPC  $\lambda_{\mathbf{q}\nu}$ .

NOTE: The tensile strain mainly affects the vibrational states and resulting EPC modes. The original remarkable Kohn anomaly in the acoustic branches is removed, and the most significant  $\lambda_{\mathbf{q}\nu}$  are distributing around the high-frequency optical  $E_{2g}$  mode near the  $\Gamma$  point (with  $E_{2g}$  frequency much declining). It leads to an increase of the logarithmic average frequency  $\omega_{\log}$  (389.6 K  $\rightarrow$  423.7 K), while the total EPC strength  $\lambda$  does almost not change ( $\lambda \sim 1.35$ ).



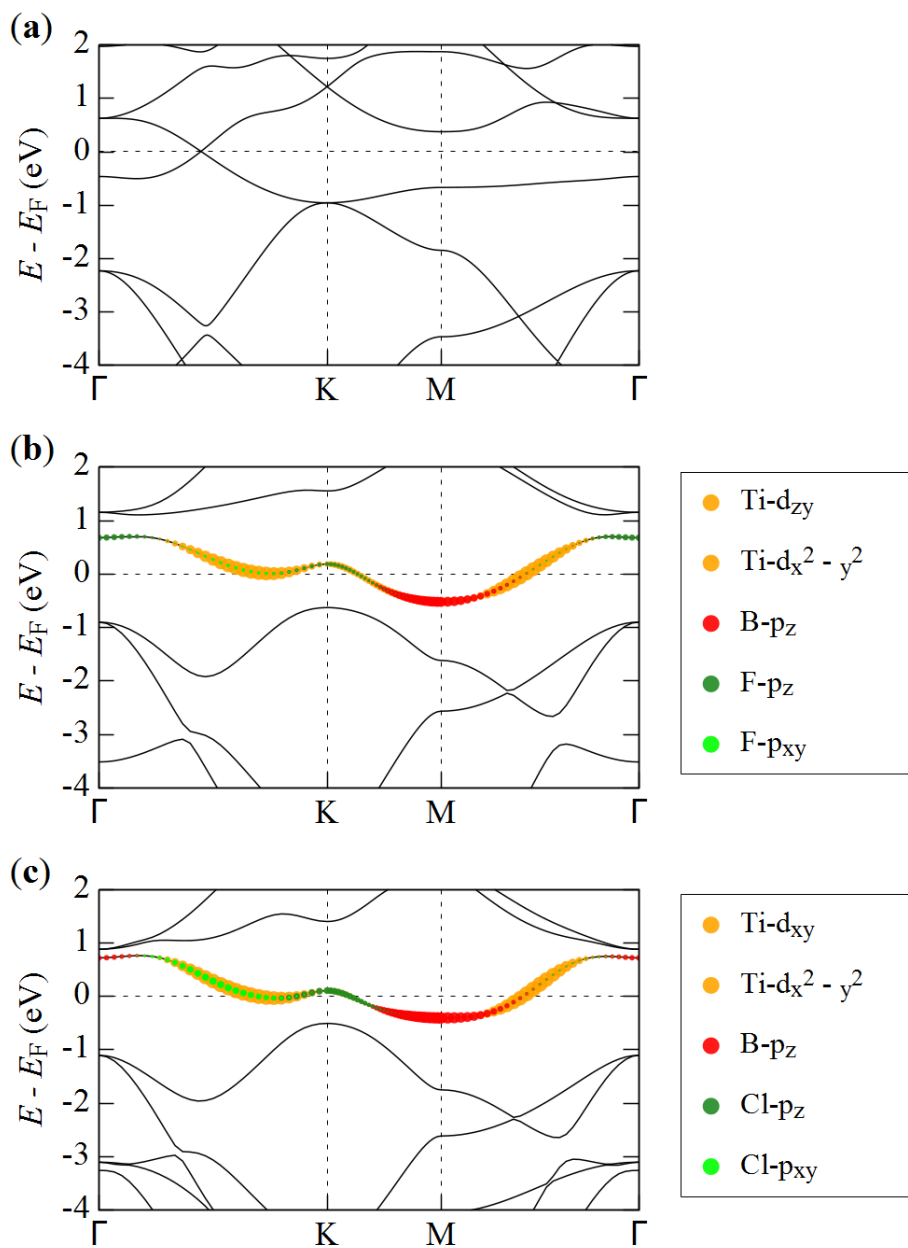

Figure S7. Electronic band structures of (a) ML  $\text{TiB}_2$ , (b) F- $\text{TiB}_2$  and (c) Cl- $\text{TiB}_2$ . The decorating color dots indicate the atomic-orbital resolved contributions. The sizes of F- $p_z$  and Cl- $p_z$  dots have been amplified four-fold for clarity in (b,c).

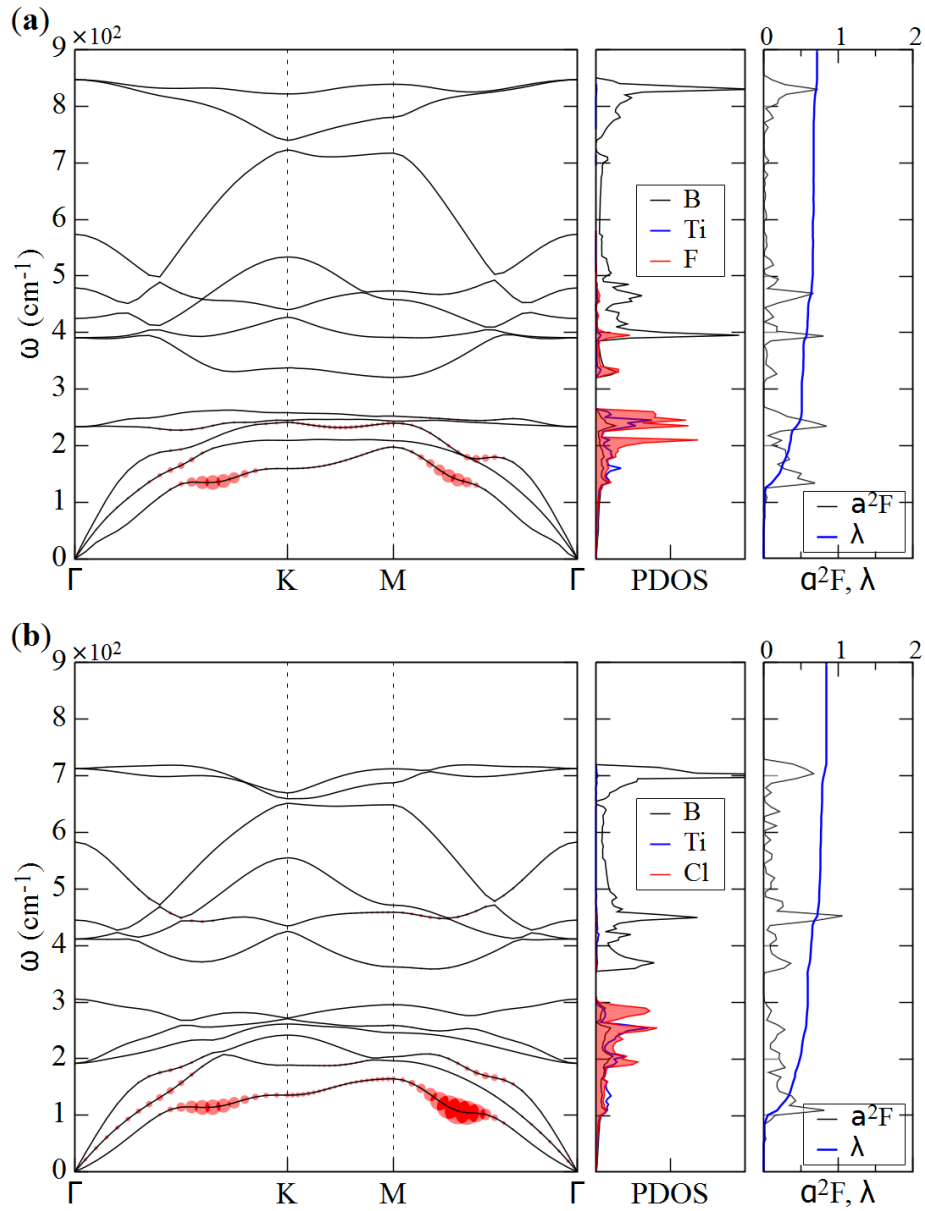

Figure S8. Phonon dispersion curve (left panel), atom-resolved phonon density of states (PDOS, mid panel), and Eliashberg function  $\alpha^2F(\omega)$  and  $\lambda(\omega)$  (right panel) of (a) F-MgB<sub>2</sub> and (b) Cl-MgB<sub>2</sub>. The color dots decorated in phonon dispersion indicate the strength of individual  $\lambda_{\mathbf{q}\nu}$ .

## References

- [1] W. L. McMillan, *Phys. Rev.* 167, 331 (1968).
- [2] P. B. Allen and R. C. Dynes, *Phys. Rev. B* 12, 905 (1975).
- [3] G. M. Eliashberg, *Sov. Phys. JETP* 11, 696 (1960).
- [4] P. E. Blochl, *Phys. Rev. B* 50, 17953 (1994); (b) G. Kresse and D. Joubert, *Phys. Rev. B* 59, 1758 (1999).
- [5] J. P. Perdew, K. Burke, and M. Ernzerhof, *Phys. Rev. Lett.* 77, 3865 (1996).
- [6] (a) G. Kresse and J. Furthmuller, *Comput. Mater. Sci.* 6, 15 (1996); (b) G. Kresse and J. Furthmuller, *Phys. Rev. B* 54, 11169 (1996).
- [7] P. Giannozzi, S. Baroni, N. Bonini, M. Calandra, R. Car, C. Cavazzoni, D. Ceresoli, G. L. Chiarotti, M. Cococcioni, I. Dabo et al., *J. Phys.: Condens. Matter* 21, 395502 (2009).
- [8] G. J. Martyna, M. L. Klein and M. Tuckerman, *J. Chem. Phys.*, 97, 2635 (1992).
- [9] J. Nagamatsu, N. Nakagawa, T. Muranaka, Y. Zenitani, and J. Akimitsu, *Nature (London)* 410, 63 (2001).
- [10] Y. Zhao, S. Zeng, and J. Ni, *Phys. Rev. B* 93, 014502 (2016).
- [11] B. Y. Song, Y. Zhou, H. M. Yang, J. H. Liao, L.M. Yang, X. B. Yang, and E. Ganz, *J. Am. Chem. Soc.* 141, 3630 (2019).
- [12] S. L. Bud'ko, G. Lapertot, C. Petrovic, C. E. Cunningham, N. Anderson, and P. C. Canfield, *Phys. Rev. Lett.* 86, 1877 (2001).
